# Supplementary material for: A conserved HH-Gli1-Mycn network regulates heart regeneration from newt to human
Source: PubMed Central journal article supplement (PMC6185975; doi:10.1038/s41467-018-06617-z), 2018-10-12
Supplement: 41467_2018_6617_MOESM2_ESM.pdf [file 41467_2018_6617_MOESM2_ESM.pdf]

## Description of Additional Supplementary Files

**File Name:** Supplementary Movie 1

**Description:** Time lapse microscopy of cultured  $\alpha$ MHC-mCherry+ P7 cardiomyocytes treated with DMSO (related to Fig. 4)

**File Name:** Supplementary Movie 2

**Description:** Time lapse microscopy of cultured  $\alpha$ MHC-mCherry+ P7 cardiomyocytes treated with SAG (related to Fig. 4)
